# Supplementary material for: Examining the Gap Between the Language of Instruction and Actual Classroom Communication Among Scholarship Students
Source: Research Square preprint supplement (doi:10.21203/rs.3.rs-8521672/v1), 2026-02-16
Supplement: Supplementary file 1 [file 166fe7a8a3bb37ed4fb94e22.xlsx]

## Sheet: Sheet1
Instrument 4: Student Survey Data (N=70)
Mapping based on Participant ID, Proficiency Level, and Cultural Background provided.
Student_ID	Proficiency	Culture	Assigned_Teacher	Prior_Exposure	Q1 (Clarity)	Q2 (Dialect Freq)	Q3 (Confusion)	Q4 (Dialect Help)	Q5 (Comfort)	Q6 (Textbook Match)	Q7 (Ha’il Prep)
S01	Level 1	Southeast Asia	Teacher A	None	4	1	2	2	2	5	1
S02	Level 1	Southeast Asia	Teacher A	Religious	5	1	1	1	2	5	1
S03	Level 1	Southeast Asia	Teacher A	None	3	2	4	3	3	5	2
S04	Level 1	Southeast Asia	Teacher A	None	4	2	3	2	2	4	1
S05	Level 1	Southeast Asia	Teacher A	Religious	5	1	1	2	2	5	2
S06	Level 1	Southeast Asia	Teacher A	None	3	2	4	3	3	4	1
S07	Level 1	Southeast Asia	Teacher A	None	4	1	2	2	2	5	1
S08	Level 1	South Asia	Teacher B	Religious	4	3	2	4	4	3	3
S09	Level 1	South Asia	Teacher B	None	3	4	4	5	4	2	3
S10	Level 1	South Asia	Teacher B	Religious	3	4	3	4	5	3	2
S11	Level 1	South Asia	Teacher B	None	2	5	5	5	4	2	3
S12	Level 1	Southeast Asia	Teacher B	None	3	4	4	4	4	3	3
S13	Level 1	Southeast Asia	Teacher B	Religious	4	3	3	4	4	3	2
S14	Level 1	Southeast Asia	Teacher B	None	3	4	4	5	5	2	3
S15	Level 1	West Africa	Teacher B	None	2	4	5	5	4	2	3
S16	Level 1	Southeast Asia	Teacher B	None	3	3	4	4	4	3	2
S17	Level 2	Southeast Asia	Teacher A	None	5	2	1	2	3	5	2
S18	Level 2	West Africa	Teacher A	Religious	4	2	2	3	3	4	2
S19	Level 2	South Asia	Teacher A	None	3	2	3	2	2	5	1
S20	Level 2	West Africa	Teacher A	Religious	5	1	1	2	2	5	2
S21	Level 2	Europe/Australia	Teacher A	None	4	2	2	3	3	4	3
S22	Level 2	Europe/Australia	Teacher A	None	4	2	3	2	2	5	2
S23	Level 2	Southeast Asia	Teacher A	Religious	5	1	1	1	2	5	1
S24	Level 2	West Africa	Teacher B	None	4	4	3	5	5	2	4
S25	Level 2	Europe/Australia	Teacher B	None	4	3	2	4	4	3	3
S26	Level 2	South Asia	Teacher B	Religious	3	4	4	5	5	2	4
S27	Level 2	Europe/Australia	Teacher B	None	4	4	3	4	4	2	3
S28	Level 2	South Asia	Teacher B	None	4	4	2	5	5	3	4
S29	Level 2	Southeast Asia	Teacher B	Religious	3	4	3	4	4	3	3
S30	Level 2	South Asia	Teacher B	None	4	4	3	5	5	2	4
S31	Level 2	Southeast Asia	Teacher B	None	4	3	2	4	5	3	3
S32	Level 2	South Asia	Teacher B	Religious	5	4	1	5	5	2	4
S33	Level 3	Europe/Australia	Teacher C	None	4	5	2	5	5	1	5
S34	Level 3	South Asia	Teacher C	Religious	5	4	1	5	5	2	4
S35	Level 3	West Africa	Teacher C	None	3	5	3	5	5	1	4
S36	Level 3	Europe/Australia	Teacher C	None	4	5	2	4	5	2	5
S37	Level 3	Europe/Australia	Teacher C	None	3	5	4	5	5	1	5
S38	Level 3	Southeast Asia	Teacher C	None	4	4	2	4	5	2	4
S39	Level 3	Europe/Australia	Teacher C	None	5	5	1	5	5	1	5
S40	Level 3	Southeast Asia	Teacher C	Religious	4	5	2	5	5	1	4
S41	Level 3	Southeast Asia	Teacher C	None	3	5	3	5	5	1	5
S42	Level 3	Southeast Asia	Teacher C	None	4	4	2	4	5	2	4
S43	Level 3	Southeast Asia	Teacher C	Religious	5	5	1	5	5	1	5
S44	Level 3	Southeast Asia	Teacher C	None	4	5	2	5	5	1	5
S45	Level 3	Europe/Australia	Teacher C	None	3	5	4	5	5	1	4
S46	Level 3	South Asia	Teacher C	Religious	5	4	1	5	5	2	4
S47	Level 3	West Africa	Teacher C	None	4	5	2	4	5	1	5
S48	Level 3	West Africa	Teacher C	None	3	5	3	5	5	1	4
S49	Level 4	Southeast Asia	Teacher C	Lived in Arab Country	5	5	1	5	5	1	5
S50	Level 4	West Africa	Teacher C	Lived in Arab Country	5	5	1	5	5	1	5
S51	Level 4	Europe/Australia	Teacher C	None	4	5	2	5	5	1	5
S52	Level 4	West Africa	Teacher C	Lived in Arab Country	5	5	1	5	5	1	5
S53	Level 4	South Asia	Teacher C	None	4	5	2	5	5	1	4
S54	Level 4	Europe/Australia	Teacher C	None	5	4	1	5	5	2	5
S55	Level 4	West Africa	Teacher C	Lived in Arab Country	5	5	1	5	5	1	5
S56	Level 4	West Africa	Teacher B	Religious	4	4	2	5	5	2	4
S57	Level 4	West Africa	Teacher B	Lived in Arab Country	5	5	1	5	5	1	5
S58	Level 4	West Africa	Teacher B	None	4	4	2	4	5	2	4
S59	Level 4	West Africa	Teacher B	Religious	5	4	1	5	5	2	4
S60	Level 4	Europe/Australia	Teacher B	None	4	4	2	5	5	2	4
S61	Level 4	West Africa	Teacher B	Lived in Arab Country	5	5	1	5	5	1	5
S62	Level 4	West Africa	Teacher B	None	4	4	2	4	5	2	3
S63	Level 4	South Asia	Teacher A	Religious	5	2	1	3	3	4	3
S64	Level 4	South Asia	Teacher A	None	4	2	2	2	3	5	2
S65	Level 1	West Africa	Teacher B	None	2	5	5	4	4	2	3
S66	Level 1	West Africa	Teacher B	None	3	4	4	5	5	3	2
S67	Level 1	West Africa	Teacher B	None	2	5	5	4	4	2	3
S68	Level 1	West Africa	Teacher B	None	3	4	4	5	5	3	2
S69	Level 1	West Africa	Teacher B	None	2	5	5	4	4	2	3
S70	Level 1	West Africa	Teacher B	None	3	4	4	5	5	3	2
Instrument 1: Classroom Observation Protocol (Summary)
Dimension	Teacher A (MSA Focus)	Teacher B (Balanced)	Teacher C (Comm. Focus)
Language Variety	90% MSA / 10% Dialect	60% MSA / 40% Dialect	40% MSA / 60% Dialect
Management	Formal MSA instructions	Hybrid (MSA + Local cues)	Predominantly Local Dialect
Humor	Very rare; formal	Occasional; local dialect	Constant; local idioms
Interaction	Rigid teacher-to-student	Fluid; some student-initiation	High peer-to-peer / Casual
Repair Sequence	Rephrasing in simpler MSA	Translation to Dialect	Peer translation/Direct localism
Instrument 2.1: Teacher Interview Profiles
Question	Teacher A	Teacher B	Teacher C
Rationales	Educational standard; exam prep.	Comprehension and rapport.	Real-world survival in Ha'il.
Dialect View	Hindrance to formal writing.	Bridge to bridge the gap.	Vital for oral fluency.
Strategy	Visual aids / Slow MSA.	Contextual switching.	Use of local Ha'il synonyms.
Alignment	"Current books are good."	"We need a hybrid syllabus."	"Major gap between book & life."
