# Supplementary material for: Examining the Gap Between the Language of Instruction and Actual Classroom Communication Among Scholarship Students
Source: Research Square preprint supplement (doi:10.21203/rs.3.rs-8521672/v1), 2026-02-16
Supplement: Supplementary file 2 [file 5eced61e6a2fd8bba4ad2fcd.docx]

**Instrument 1: Classroom Observation Protocol**

**General Information**

- **Observer:** __________________________
- **Date:** ______________________________
- **Course Level/Title:** _________________
- **Number of Students:** _______________
- **Lesson Phase:** ☐ Presentation ☐ Practice ☐ Feedback/Review

**Section A: Language Variety & Functional Distribution**
*Mark the variety used for each instructional function (MSA = Modern Standard Arabic, LD = Local Dialect, CS = Code-switching)*

| **Instructional Function** | **MSA** | **LD** | **CS** | **Notes on Context/Examples** |
| --- | --- | --- | --- | --- |
| 1. Explanation of linguistic content | ☐ | ☐ | ☐ |  |
| 1. Classroom management/Directions | ☐ | ☐ | ☐ |  |
| 1. Feedback and error correction | ☐ | ☐ | ☐ |  |
| 1. Humor or informal interaction | ☐ | ☐ | ☐ |  |
| 1. Assessment-related talk | ☐ | ☐ | ☐ |  |

**Section B: Switching Characteristics**

- **Switching Type:** ☐ Marked (explicitly signaled) ☐ Unmarked (implicit/automatic)
- **Frequency:** ☐ Rare ☐ Occasional ☐ Frequent ☐ Constant
- **Timing:** (e.g., switching to dialect after an MSA explanation fails) ______________________________________________________________________________

**Section C: Interactional Patterns**

- **Turn-taking:** ☐ Teacher-led ☐ Student-initiated ☐ Peer-to-peer
- **Questioning Strategies:** ☐ Closed (Yes/No) ☐ Open-ended ☐ Clarification probes
- **Repair Sequences:** How are misunderstandings resolved? ______________________________________________________________________________

______________________________________________________________________________

______________________________________________________________________________

______________________________________________________________________________

**Section D: Engagement Indicators**

- **Participation Level:** ☐ High ☐ Moderate ☐ Low
- **Signs of Confusion:** ☐ Silence/Hesitation ☐ Request for clarification ☐ Non-verbal (puzzled looks)
- **Peer Support:** Do students translate for one another? ☐ Yes ☐ No

**Section E: Field Notes & Summary**
*(Provide details on the "naturalness" of communication vs. adherence to instructional goals)*

**Instrument 2.1: Teacher Interview Protocol**

**Introduction:**
*Thank you for participating. This interview explores your experiences with language use in the Arabic for non-native speakers program at the University of Ha’il.*

1. **Instructional Choices:** How do you decide when to use Modern Standard Arabic (MSA) versus the local dialect during a lesson?
2. **Pedagogical Beliefs:** What do you see as the primary benefits and limitations of using dialect in a classroom theoretically dedicated to MSA?
3. **Comprehension Strategies:** When students seem confused by MSA, what is your "go-to" strategy for ensuring they understand the material?
4. **Student Response:** How do students react when you switch between varieties? Do you notice a change in their comfort levels?
5. **Professional Challenges:** How do you balance the need for linguistic "purity" (MSA) with the need for "natural" communication in the classroom?
6. **Institutional Alignment:** Do you feel the current curriculum supports the reality of how you need to communicate with your students?

**Instrument 2.2: Student Interview & Focus Group Protocol**

**Introduction:**
*We want to understand your experience learning Arabic. Please share your thoughts on the language your teachers use during class.*

1. **Clarity:** How easy or difficult is it to understand your teacher when they give instructions or explain grammar?
2. **Varieties:** Does your teacher use words that are different from what is in your textbook? If so, how does that make you feel?
3. **Confusion:** Can you describe a time you were confused by the language used in class? How did you handle it?
4. **Inclusion:** Do you feel more included in the class when the teacher uses formal Arabic or when they use more informal/local language?
5. **Participation:** Does the type of language the teacher uses affect your willingness to speak or ask questions?
6. **Practicality:** Do you feel the language you hear in the classroom prepares you for speaking with people outside the university in Ha’il?

**Instrument 3: Document Analysis Instrument**

**Document Identification**

- **Type:** ☐ Syllabus ☐ Textbook ☐ Lesson Plan ☐ Departmental Guideline
- **Course Level:** _______________________

**Analysis Rubric**

| **Criterion** | **Observations/Evidence** |
| --- | --- |
| **Official Language Policy** | Explicit mentions of MSA as the sole medium of instruction? |
| **Curricular Emphasis** | Is the focus on "literary/formal" competence or "communicative/spoken" competence? |
| **Dialect Presence** | Are local varieties or "Ammiya" mentioned or included in materials? |
| **Instructional Objectives** | Do objectives require students to interact in "real-world" (spoken) scenarios? |
| **Alignment Gap** | Note any contradictions between textbook language and observed classroom needs. |

**Summary of Institutional Expectations:**

**Instrument 4: Student Survey**

**Part A: Background**

1. **Current Proficiency Level:** ☐ Beginner ☐ Intermediate ☐ Advanced
2. **Prior Exposure to Arabic:** ☐ None ☐ Religious study only ☐ Lived in an Arabic-speaking country

**Part B: Language Perceptions**
*Please rate your level of agreement with the following statements (1 = Strongly Disagree, 5 = Strongly Agree)*

| **Statement** | **1** | **2** | **3** | **4** | **5** |
| --- | --- | --- | --- | --- | --- |
| 1. The language my teacher uses is clear and easy to follow. | ☐ | ☐ | ☐ | ☐ | ☐ |
| 1. My teacher often uses the local dialect during class. | ☐ | ☐ | ☐ | ☐ | ☐ |
| 1. I feel confused when the teacher switches between formal Arabic and dialect. | ☐ | ☐ | ☐ | ☐ | ☐ |
| 1. Using local dialect helps me understand difficult concepts better. | ☐ | ☐ | ☐ | ☐ | ☐ |
| 1. I feel more comfortable participating when the teacher uses informal language. | ☐ | ☐ | ☐ | ☐ | ☐ |
| 1. The language in my textbook is the same as the language used by my teacher. | ☐ | ☐ | ☐ | ☐ | ☐ |
| 1. I feel prepared to communicate with people in the city of Ha’il. | ☐ | ☐ | ☐ | ☐ | ☐ |

**Part C: Open Comments**
What is the biggest challenge you face regarding the language used by your instructors?
