# Supplementary material for: Examining the Gap Between the Language of Instruction and Actual Classroom Communication Among Scholarship Students
Source: Research Square preprint supplement (doi:10.21203/rs.3.rs-8521672/v1), 2026-02-16
Supplement: Supplementary file 3 [file 81a30fbfab10694cba96184e.xlsx]

## Sheet: Sheet1
NPAR TESTS
/K-W=Q1Clarity Q2DialectFreq Q3Confusion Q4DialectHelp Q5Comfort Q6TextbookMatch Q7Ha’ilPrep BY CurrentProficiencyLevel(1 3)
/STATISTICS DESCRIPTIVES
/MISSING ANALYSIS.
NPar Tests
Notes
Output Created		02-JAN-2026 15:20:45
Comments
Input	Active Dataset	$DataSet
	Filter	<none>
	Weight	<none>
	Split File	<none>
	N of Rows in Working Data File	70
Missing Value Handling	Definition of Missing	User-defined missing values are treated as missing.
	Cases Used	Statistics for each test are based on all cases with valid data for the variable(s) used in that test.
Syntax		NPAR TESTS /K-W=Q1Clarity Q2DialectFreq Q3Confusion Q4DialectHelp Q5Comfort Q6TextbookMatch Q7Ha’ilPrep BY CurrentProficiencyLevel(1 3) /STATISTICS DESCRIPTIVES /MISSING ANALYSIS.
Resources	Processor Time	00:00:00.02
	Elapsed Time	00:00:00.02
	Number of Cases Alloweda	60494
a. Based on availability of workspace memory.
Descriptive Statistics
	N	Mean	Std. Deviation	Minimum	Maximum
Q1 (Clarity)	70	3.87143	0.89962	2	5
Q2 (Dialect Freq)	70	3.72857	1.30685	1	5
Q3 (Confusion)	70	2.45714	1.259	1	5
Q4 (Dialect Help)	70	4.1	1.16905	1	5
Q5 (Comfort)	70	4.22857	1.07907	2	5
Q6 (Textbook Match)	70	2.51429	1.38043	1	5
Q7 (Ha’il Prep)	70	3.32857	1.29348	1	5
Current Proficiency Level	70	2.07143	0.804362	1	3
Kruskal-Wallis Test
Ranks
Current Proficiency Level		N	Mean Rank
Q1 (Clarity)	Beginner	20	29.55
	Intermediate	25	36.68
	Advanced	25	39.08
	Total	70
Q2 (Dialect Freq)	Beginner	20	18.6
	Intermediate	25	39.58
	Advanced	25	44.94
	Total	70
Q3 (Confusion)	Beginner	20	42.25
	Intermediate	25	34.64
	Advanced	25	30.96
	Total	70
Q4 (Dialect Help)	Beginner	20	21.5
	Intermediate	25	39.54
	Advanced	25	42.66
	Total	70
Q5 (Comfort)	Beginner	20	17.4
	Intermediate	25	41.68
	Advanced	25	43.8
	Total	70
Q6 (Textbook Match)	Beginner	20	52.875
	Intermediate	25	30
	Advanced	25	27.1
	Total	70
Q7 (Ha’il Prep)	Beginner	20	15.35
	Intermediate	25	43.94
	Advanced	25	43.18
	Total	70
Test Statisticsa,b
	Q1 (Clarity)	Q2 (Dialect Freq)	Q3 (Confusion)	Q4 (Dialect Help)	Q5 (Comfort)	Q6 (Textbook Match)	Q7 (Ha’il Prep)
Chi-Square	2.85625	22.1612	3.71681	16.036	28.2184	22.0895	28.8547
df	2	2	2	2	2	2	2
Asymp. Sig.	0.239758	1.54087e-05	0.155921	0.000329485	7.45505e-07	1.59711e-05	5.4236e-07
a. Kruskal Wallis Test
b. Grouping Variable: Current Proficiency Level
