# Supplementary material for: Examining the Gap Between the Language of Instruction and Actual Classroom Communication Among Scholarship Students
Source: Research Square preprint supplement (doi:10.21203/rs.3.rs-8521672/v1), 2026-02-16
Supplement: Supplementary file 4 [file d9df7700512384c9c9914168.xlsx]

## Sheet: Sheet1
NPAR TESTS
/CHISQUARE=@1. Explanationoflinguisticcontent @2. ClassroommanagementDirections @3. Feedbackanderrorcorrection @4. Humororinformalinteraction @5. Assessmentrelatedtalk
/EXPECTED=EQUAL
/STATISTICS DESCRIPTIVES
/MISSING ANALYSIS.
NPar Tests
Notes
Output Created		02-JAN-2026 15:29:27
Comments
Input	Active Dataset	$DataSet
	Filter	<none>
	Weight	<none>
	Split File	<none>
	N of Rows in Working Data File	70
Missing Value Handling	Definition of Missing	User-defined missing values are treated as missing.
	Cases Used	Statistics for each test are based on all cases with valid data for the variable(s) used in that test.
Syntax		NPAR TESTS /CHISQUARE=@1. Explanationoflinguisticcontent @2. ClassroommanagementDirections @3. Feedbackanderrorcorrection @4. Humororinformalinteraction @5. Assessmentrelatedtalk /EXPECTED=EQUAL /STATISTICS DESCRIPTIVES /MISSING ANALYSIS.
Resources	Processor Time	00:00:00.02
	Elapsed Time	00:00:00.01
	Number of Cases Alloweda	98304
a. Based on availability of workspace memory.
Descriptive Statistics
	N	Mean	Std. Deviation	Minimum	Maximum
1. Explanation of linguistic content	70	1.4	0.805776	1	3
2. Classroom management/Directions	70	1.94286	0.899045	1	3
3. Feedback and error correction	70	1.92857	0.952821	1	3
4. Humor or informal interaction	70	2.27143	0.611992	1	3
5. Assessment-related talk	70	1.68571	0.956183	1	3
Chi-Square Test
Frequencies
1. Explanation of linguistic content
	Observed N	Expected N	Residual
MSA	56	35	21
CS	14	35	-21
Total	70
2. Classroom management/Directions
	Observed N	Expected N	Residual
MSA	30	23.3333	6.66667
Ld	14	23.3333	-9.33333
CS	26	23.3333	2.66667
Total	70
3. Feedback and error correction
	Observed N	Expected N	Residual
MSA	34	23.3333	10.6667
Ld	7	23.3333	-16.3333
CS	29	23.3333	5.66667
Total	70
4. Humor or informal interaction
	Observed N	Expected N	Residual
MSA	6	23.3333	-17.3333
Ld	39	23.3333	15.6667
CS	25	23.3333	1.66667
Total	70
5. Assessment-related talk
	Observed N	Expected N	Residual
MSA	46	35	11
CS	24	35	-11
Total	70
Test Statistics
	1. Explanation of linguistic content	2. Classroom management/Directions	3. Feedback and error correction	4. Humor or informal interaction	5. Assessment-related talk
Chi-Square	25.200a	5.943b	17.686b	23.514b	6.914a
df	1	2	2	2	1
Asymp. Sig.	5.16822e-07	0.0512301	0.00014441	7.83317e-06	0.00855098
a. 0 cells (0.0%) have expected frequencies less than 5. The minimum expected cell frequency is 35.0.
b. 0 cells (0.0%) have expected frequencies less than 5. The minimum expected cell frequency is 23.3.
