# Supplementary material for: Examining the Gap Between the Language of Instruction and Actual Classroom Communication Among Scholarship Students
Source: Research Square preprint supplement (doi:10.21203/rs.3.rs-8521672/v1), 2026-02-16
Supplement: Supplementary file 5 [file deb087f565e5de2f27e0c671.xlsx]

## Sheet: Sheet1
FREQUENCIES VARIABLES=Proficiency Culture Assigned_Teacher Prior_Exposure CurrentProficiencyLevel Q1Clarity Q2DialectFreq Q3Confusion Q4DialectHelp Q5Comfort Q6TextbookMatch Q7Ha’ilPrep @1. Explanationoflinguisticcontent
@2. ClassroommanagementDirections @3. Feedbackanderrorcorrection @4. Humororinformalinteraction @5. Assessmentrelatedtalk
/STATISTICS=STDDEV MEAN
/ORDER=ANALYSIS.
Frequencies
Notes
Output Created		02-JAN-2026 15:01:16
Comments
Input	Active Dataset	$DataSet
	Filter	<none>
	Weight	<none>
	Split File	<none>
	N of Rows in Working Data File	70
Missing Value Handling	Definition of Missing	User-defined missing values are treated as missing.
	Cases Used	Statistics are based on all cases with valid data.
Syntax		FREQUENCIES VARIABLES=Proficiency Culture Assigned_Teacher Prior_Exposure CurrentProficiencyLevel Q1Clarity Q2DialectFreq Q3Confusion Q4DialectHelp Q5Comfort Q6TextbookMatch Q7Ha’ilPrep @1. Explanationoflinguisticcontent @2. ClassroommanagementDirections @3. Feedbackanderrorcorrection @4. Humororinformalinteraction @5. Assessmentrelatedtalk /STATISTICS=STDDEV MEAN /ORDER=ANALYSIS.
Resources	Processor Time	00:00:00.05
	Elapsed Time	00:00:00.05
Statistics
		Proficiency	Culture	Assigned_Teacher	Prior_Exposure	Current Proficiency Level	Q1 (Clarity)	Q2 (Dialect Freq)	Q3 (Confusion)	Q4 (Dialect Help)	Q5 (Comfort)	Q6 (Textbook Match)	Q7 (Ha’il Prep)	1. Explanation of linguistic content	2. Classroom management/Directions	3. Feedback and error correction	4. Humor or informal interaction	5. Assessment-related talk
N	Valid	70	70	70	70	70	70	70	70	70	70	70	70	70	70	70	70	70
	Missing	0	0	0	0	0	0	0	0	0	0	0	0	0	0	0	0	0
Mean							3.87143	3.72857	2.45714	4.1	4.22857	2.51429	3.32857
Std. Deviation							0.89962	1.30685	1.259	1.16905	1.07907	1.38043	1.29348
Frequency Table
Proficiency
		Frequency	Percent	Valid Percent	Cumulative Percent
Valid	Level 1	22	31.4286	31.4286	31.4286
	Level 2	16	22.8571	22.8571	54.2857
	Level 3	16	22.8571	22.8571	77.1429
	Level 4	16	22.8571	22.8571	100
	Total	70	100	100
Culture
		Frequency	Percent	Valid Percent	Cumulative Percent
Valid	Europe/Australia	12	17.1429	17.1429	17.1429
	South Asia	14	20	20	37.1429
	Southeast Asia	22	31.4286	31.4286	68.5714
	West Africa	22	31.4286	31.4286	100
	Total	70	100	100
Assigned_Teacher
		Frequency	Percent	Valid Percent	Cumulative Percent
Valid	Teacher A	16	22.8571	22.8571	22.8571
	Teacher B	31	44.2857	44.2857	67.1429
	Teacher C	23	32.8571	32.8571	100
	Total	70	100	100
Prior_Exposure
		Frequency	Percent	Valid Percent	Cumulative Percent
Valid	Lived in Arab Country	6	8.57143	8.57143	8.57143
	None	46	65.7143	65.7143	74.2857
	Religious	18	25.7143	25.7143	100
	Total	70	100	100
Current Proficiency Level
		Frequency	Percent	Valid Percent	Cumulative Percent
Valid	Advanced	25	35.7143	35.7143	35.7143
	Beginner	20	28.5714	28.5714	64.2857
	Intermediate	25	35.7143	35.7143	100
	Total	70	100	100
Q1 (Clarity)
		Frequency	Percent	Valid Percent	Cumulative Percent
Valid	Disagre	5	7.14286	7.14286	7.14286
	neutral	18	25.7143	25.7143	32.8571
	agree	28	40	40	72.8571
	Strongly agree	19	27.1429	27.1429	100
	Total	70	100	100
Q2 (Dialect Freq)
		Frequency	Percent	Valid Percent	Cumulative Percent
Valid	Strongly Disagre	6	8.57143	8.57143	8.57143
	Disagre	10	14.2857	14.2857	22.8571
	neutral	5	7.14286	7.14286	30
	agree	25	35.7143	35.7143	65.7143
	Strongly agree	24	34.2857	34.2857	100
	Total	70	100	100
Q3 (Confusion)
		Frequency	Percent	Valid Percent	Cumulative Percent
Valid	Strongly Disagre	19	27.1429	27.1429	27.1429
	Disagre	22	31.4286	31.4286	58.5714
	neutral	12	17.1429	17.1429	75.7143
	agree	12	17.1429	17.1429	92.8571
	Strongly agree	5	7.14286	7.14286	100
	Total	70	100	100
Q4 (Dialect Help)
		Frequency	Percent	Valid Percent	Cumulative Percent
Valid	Strongly Disagre	2	2.85714	2.85714	2.85714
	Disagre	9	12.8571	12.8571	15.7143
	neutral	5	7.14286	7.14286	22.8571
	agree	18	25.7143	25.7143	48.5714
	Strongly agree	36	51.4286	51.4286	100
	Total	70	100	100
Q5 (Comfort)
		Frequency	Percent	Valid Percent	Cumulative Percent
Valid	Disagre	9	12.8571	12.8571	12.8571
	neutral	7	10	10	22.8571
	agree	13	18.5714	18.5714	41.4286
	Strongly agree	41	58.5714	58.5714	100
	Total	70	100	100
Q6 (Textbook Match)
		Frequency	Percent	Valid Percent	Cumulative Percent
Valid	Strongly Disagre	19	27.1429	27.1429	27.1429
	Disagre	23	32.8571	32.8571	60
	neutral	12	17.1429	17.1429	77.1429
	agree	5	7.14286	7.14286	84.2857
	Strongly agree	11	15.7143	15.7143	100
	Total	70	100	100
Q7 (Ha’il Prep)
		Frequency	Percent	Valid Percent	Cumulative Percent
Valid	Strongly Disagre	7	10	10	10
	Disagre	13	18.5714	18.5714	28.5714
	neutral	16	22.8571	22.8571	51.4286
	agree	18	25.7143	25.7143	77.1429
	Strongly agree	16	22.8571	22.8571	100
	Total	70	100	100
1. Explanation of linguistic content
		Frequency	Percent	Valid Percent	Cumulative Percent
Valid	cs	14	20	20	20
	MSA	56	80	80	100
	Total	70	100	100
2. Classroom management/Directions
		Frequency	Percent	Valid Percent	Cumulative Percent
Valid	cs	26	37.1429	37.1429	37.1429
	LD	14	20	20	57.1429
	MSA	30	42.8571	42.8571	100
	Total	70	100	100
3. Feedback and error correction
		Frequency	Percent	Valid Percent	Cumulative Percent
Valid	cs	29	41.4286	41.4286	41.4286
	LD	7	10	10	51.4286
	MSA	34	48.5714	48.5714	100
	Total	70	100	100
4. Humor or informal interaction
		Frequency	Percent	Valid Percent	Cumulative Percent
Valid	cs	25	35.7143	35.7143	35.7143
	LD	39	55.7143	55.7143	91.4286
	MSA	6	8.57143	8.57143	100
	Total	70	100	100
5. Assessment-related talk
		Frequency	Percent	Valid Percent	Cumulative Percent
Valid	cs	24	34.2857	34.2857	34.2857
	MSA	46	65.7143	65.7143	100
	Total	70	100	100
